# Supplementary material
Source: PubMed Central journal article supplement (PMC3341066)
Supplement: 1117537109_pnas.201117537SI.pdf [file 1117537109_pnas.201117537SI.pdf]

# Supporting Information

Uchida et al. 10.1073/pnas.1117537109

## SI Materials and Methods

For microarray and statistical analysis, developing inflorescence tips from 33-d-old WT Col, *er-2*, and *epfl4 epfl6/chal-2* were subjected to RNA preparation, cDNA synthesis, and hybridization to Affymetrix ATH1 chips. *er-2* was used because *er-105* carries an additional *gll* mutation (1). Three biological replicates were used. The microarray data were normalized as described previously (2). Quality control and RMA normalization with Benjamin-Hochberg *P* value correction was performed using Robin software (3). Further statistical analysis was performed using MultiExperiment Viewer software (4). Genes with statis-

tically significant (*Q* value cutoff of <0.001) deregulation compared with WT were identified using the Significance of Microarrays module. A twofold-change filter was applied as a cutoff. Annotation of genes and classification into functional pathways was performed with MapMan software (5). PageMan software (6) was used for overrepresentation analysis. Overrepresentation of promoter motifs in commonly regulated genes was performed with the Analysis Suite of the Athena tool (<http://www.bioinformatics2.wsu.edu/athena>), using a *P* value cutoff of 0.001. A distance 3,000 bp upstream of genes was considered with cutoffs at adjacent genes activated.

1. Torii KU, et al. (1996) The *Arabidopsis* *ERECTA* gene encodes a putative receptor protein kinase with extracellular leucine-rich repeats. *Plant Cell* 8:735–746.
2. Pillitteri LJ, Peterson KM, Horst RJ, Torii KU (2011) Molecular profiling of stomatal meristems reveals new component of asymmetric cell division and commonalities among stem cell populations in *Arabidopsis*. *Plant Cell* 23:3260–3275.
3. Lohse M, et al. (2010) Robin: An intuitive wizard application for R-based expression microarray quality assessment and analysis. *Plant Physiol* 153:642–651.
4. Saeed AI, et al. (2003) TM4: A free, open-source system for microarray data management and analysis. *Biotechniques* 34:374–378.
5. Thimm O, et al. (2004) MapMan: A user-driven tool to display genomics data sets onto diagrams of metabolic pathways and other biological processes. *Plant J* 37:914–939.
6. Usadel B, et al. (2006) PageMan: An interactive ontology tool to generate, display, and annotate overview graphs for profiling experiments. *BMC Bioinformatics* 7:535.

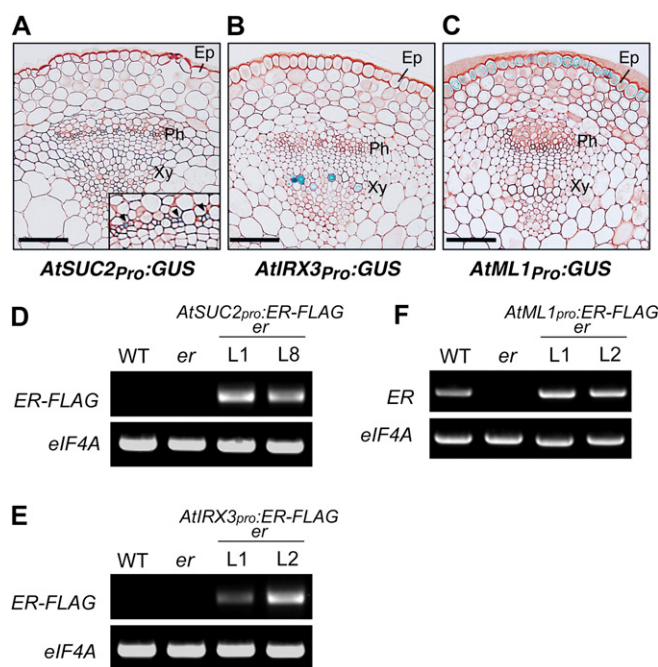

**Fig. S1.** Activities and expression patterns of tissue layer-specific promoters used in this study. (A–C) Reporter  $\beta$ -glucuronidase (GUS) histochemical analysis. Shown are inflorescence stem sections from transgenic *Arabidopsis* plants expressing *AtSUC2pro:GUS* (A), *AtIRX3pro:GUS* (B), and *AtML1pro:GUS* (C). Specific GUS staining detected in the phloem (companion cells; A), xylem (B), and epidermis (C) indicate that the three promoter fragments used in this study drive correct expression patterns. (Scale bar: 25  $\mu$ m.) (D–F) Expression of *ER-FLAG* transcripts driven by tissue-specific promoters. Shown is the RT-PCR analysis of *ER-FLAG* (D and E) and *ER* transcripts (F) from seedlings of WT, *er*, and two transgenic *er* lines each expressing *AtSUC2pro:ER-FLAG* (D), *AtIRX3pro:ER-FLAG* (E), and *AtML1pro:ER-FLAG* (F). For D and E, a reverse primer corresponding to the C-terminal FLAG-tag region was used for PCR, resulting in the absence of transcripts in WT (nontransgenic plants). *eIF4A* expression served as a positive control.

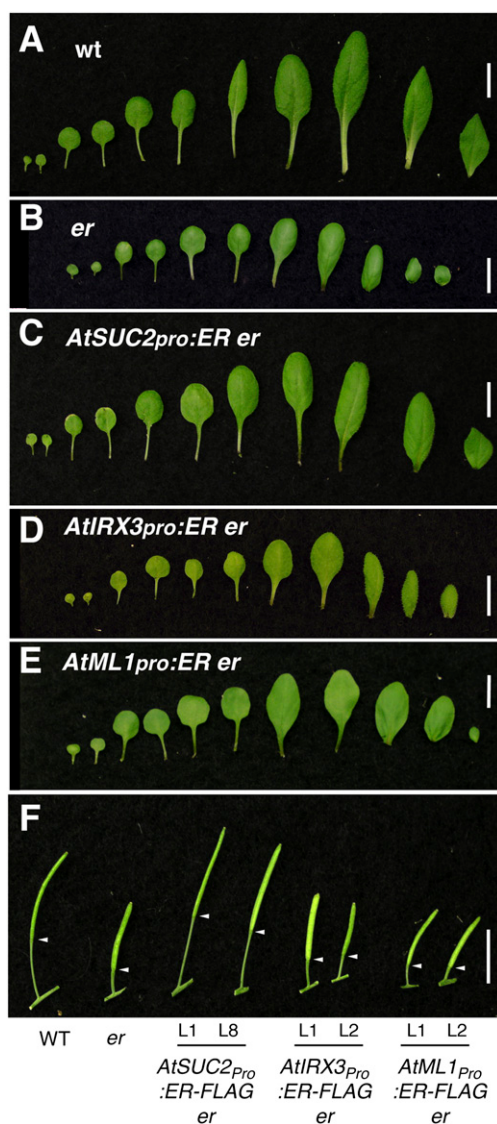

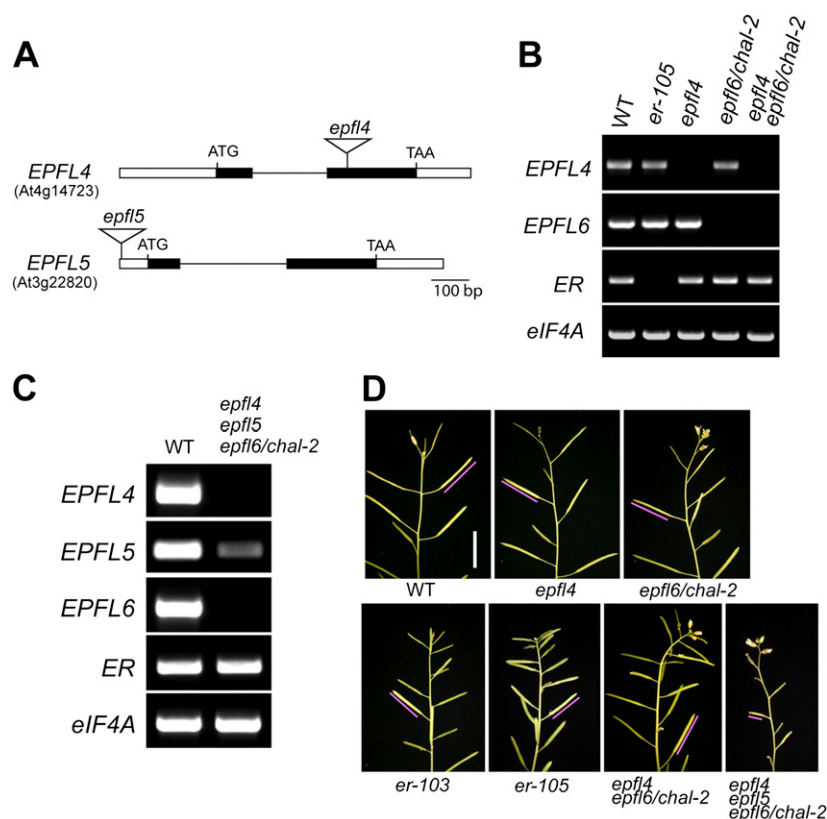

**Fig. S3.** Characterization of *EPFL4*, *EPFL5*, and *EPFL6* T-DNA insertion alleles and their mutant inflorescence phenotypes. (A) Structure of *EPFL4* and *EPFL5* genes. Open box, 5' and 3' UTR; closed box, exon; line, intron. The locations of T-DNA insertions are indicated by triangles. (B) RT-PCR analysis of 1-wk-old seedlings of WT, *er-105*, *epfl4*, *epfl6/chal-2*, and *epfl4 epfl6/chal-2*. As reported previously, *er-105* (1) and *epfl6/chal-2* (2) are transcriptionally null. *epfl4* does not accumulate detectable *EPFL4* transcripts. Up-regulation of *EPFL6* and *EPFL4* is not observed in *epfl4* and *epfl6* seedlings, respectively, suggesting no clear feedback regulation between *EPFL4* and *EPFL6*. (C) RT-PCR analysis of *EPFL4*, *EPFL5*, and *EPFL6* in WT and *epfl4 epfl5 epfl6/chal-2* triple-mutant inflorescence. *EPFL5* expression is reduced in the triple mutant, suggesting that *epfl5* is a knockdown allele. (D) Inflorescence and fruit phenotypes conferred by successive loss of *EPFL4*, *EPFL5*, and *EPFL6*. Shown are side views of 7-wk-old inflorescence from WT, *epfl4*, *epfl6/chal-2*, *er-105*, *er-103*, *epfl4 epfl6/chal-2*, and *epfl4 epfl5 epfl6/chal-2*. The *epfl4 epfl5 epfl6/chal-2* triple mutant confers significantly reduced fertility, and consequently siliques do not expand. In each panel, a representative silique is highlighted by a pink line. All images were obtained under the same magnification. (Scale bar: 10 mm.)

1. Torii KU, et al. (1996) The *Arabidopsis* *ERECTA* gene encodes a putative receptor protein kinase with extracellular leucine-rich repeats. *Plant Cell* 8:735-746.
2. Abrash EB, Bergmann DC (2010) Regional specification of stomatal production by the putative ligand CHALLAH. *Development* 137:447-455.

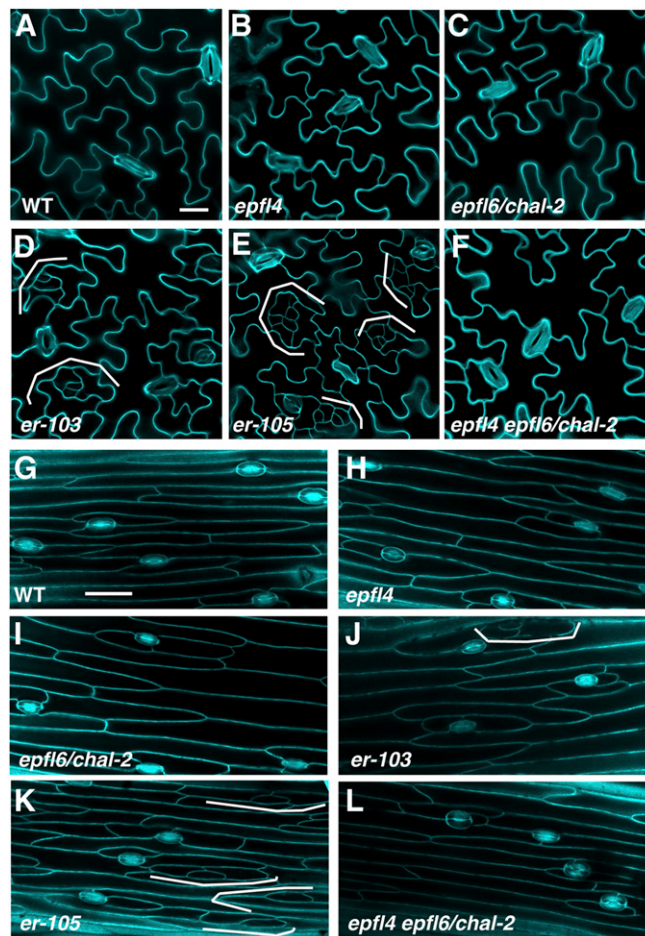

**Fig. S4.** *epfl4 epfl6/chal-2* mutant does not exhibit stomatal patterning defects like *er*. (A–F) Two-wk-old cotyledon abaxial epidermis from WT (A), *epfl4* (B), *epfl6/chal-2* (C), *er-103* (D), *er-105* (E), and *epfl4 epfl6/chal-2* (F). (G–L) Six-wk-old inflorescence stem epidermis from WT (G), *epfl4* (H), *epfl6/chal-2* (I), *er-103* (J), *er-105* (K), and *epfl4 epfl6/chal-2* (L). *er* mutant cotyledon and stem epidermis exhibits characteristic phenotype of excessive asymmetric entry divisions, leading to clusters of small, stomatal-lineage ground cells with an arrested stomatal precursor (brackets). The null allele *er-105* (E and K) shows more a severe phenotype than the intermediate allele *er-103* (D and J). Unlike in *er*, the epidermis of *epfl4 epfl6/chal-2* double mutant (F and L) does not undergo aberrant, excessive asymmetric entry divisions. A–F were obtained under the same magnification, as were G–L. (Scale bars: 20  $\mu$ m.)

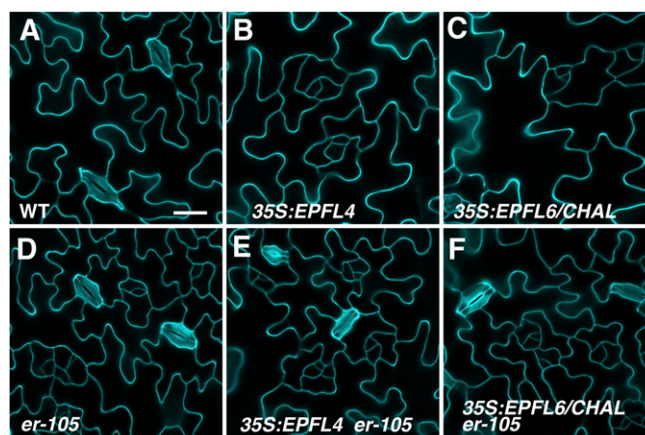

**Fig. S5.** Ectopic overexpression of *EPFL4* and *EPFL6/CHAL* in an *er* null background. Shown are 2-wk-old cotyledon abaxial epidermis from WT (A), *CaMV35S:EPFL4* (B), *CaMV35S:EPFL6/CHAL* (C), *er-105* (D), *CaMV35S:EPFL4* in *er-105* (E), and *CaMV35S:EPFL6/CHAL* in *er-105* (F). Ectopic overexpression of *EPFL4* and *EPFL6/CHAL* (B and C) inhibits stomatal differentiation, resulting in arrested precursors. The ectopic effects are diminished in the absence of *ER* (E and F). All images were obtained under the same magnification. (Scale bar: 20  $\mu$ m.)



|                 | 10                                                 | 20 | 30 | 40 | 50     |        |
|-----------------|----------------------------------------------------|----|----|----|--------|--------|
| At4g37810_EPFL2 | IGSRPPRCERVRCSCG-HCEAIQVPT--NPQTKLHSPLTSSSSSSSETI  |    |    |    |        | [ 47 ] |
| At5g10310_EPFL1 | LGSTPPSCH-NRCNNCH-PCMAIQVPT-LPTRSRFTRVNPFGGFFVRPPS |    |    |    |        | [ 47 ] |
| At1g80133_EPFL8 | MGSEPPVCA-TKCRNCK-PCLPYLFDIRGAHDDDDDDSEP-----      |    |    |    |        | [ 37 ] |
| At2g30370_EPFL6 | LGSSPPRCS-SKCGRCT-PCKPVHVPVPP--GTPVTAE-----        |    |    |    |        | [ 34 ] |
| At3g22820_EPFL5 | PGSVPPMCR-LKCGKCE-PCKAVHVP IQP--GLIMPLE-----       |    |    |    |        | [ 34 ] |
| At4g14723_EPFL4 | PGSSPPTCR-SKCGKQ-PCKPVHVP IQP--GLSMPL-----         |    |    |    |        | [ 34 ] |
| AB499312_EPFL3  | IGSKPPSCE-KKCYGCE-PCEAIQFP TISSIPHLSPHYA-----      |    |    |    |        | [ 37 ] |
| At4g12970_EPFL9 | IGSTAPTCTYNECRGCRYKRAEQVPVEG--NDPINS-----          |    |    |    |        | [ 35 ] |
| At2g20875_EPF1  | AGSRLPDCS-HACGSCS-PCRLVMVSFVCASVE--EAETC-----      |    |    |    |        | [ 36 ] |
| At1g34245_EPF2  | TGSSLPDCS-YACGACS-PCKRVMISFECS-----VAESC-----      |    |    |    |        | [ 33 ] |
| AB499313_EPFL7  | SGSSIPDCS-NACGPCK-PCKLVVISSTCS-----ASEAC-----      |    |    |    |        | [ 33 ] |
|                 | 60                                                 | 70 | 80 |    |        |        |
| At4g37810_EPFL2 | HLDYTRGDDSTNYKPMWKCCKGNSIYNP----                   |    |    |    | [ 76 ] |        |
| At5g10310_EPFL1 | SLTTVLQYS-NYKPMGWKCHCNGHFYNP----                   |    |    |    | [ 75 ] |        |
| At1g80133_EPFL8 | -----YYPVKWICRCRDRVFEP----                         |    |    |    | [ 54 ] |        |
| At2g30370_EPFL6 | -----YYPEAWRCKCGNKLMP----                          |    |    |    | [ 51 ] |        |
| At3g22820_EPFL5 | -----YYPEAWRCKCGNKLMP----                          |    |    |    | [ 51 ] |        |
| At4g14723_EPFL4 | -----YYPEAWRCKCGNKLMP----                          |    |    |    | [ 51 ] |        |
| AB499312_EPFL3  | -----NYQPEGWRCHCPP-----                            |    |    |    | [ 51 ] |        |
| At4g12970_EPFL9 | -----AYHYRCVCHR-----                               |    |    |    | [ 45 ] |        |
| At2g20875_EPF1  | -----PMAYKCMCNKSYVPV----                           |    |    |    | [ 52 ] |        |
| At1g34245_EPF2  | -----SVIYRCTCRGRYYHVPSRA                           |    |    |    | [ 52 ] |        |
| AB499313_EPFL7  | -----PLVYKCLCKGKYHVPSLT                            |    |    |    | [ 52 ] |        |

**Fig. S8.** Amino acid sequence alignment of the EPFL family genes used in this study. The predicted mature C-terminal EPF/EPFL domains were used for the alignment. The alignment was generated using Clustal X GUI version (<http://www.clustal.org/download/current/>).

## Other Supporting Information Files

[Dataset S1 \(XLS\)](#)
